# Supplementary material for: Synthetic lethality of PARP and NAMPT inhibition in triple-negative breast cancer cells
Source: PubMed Central journal article supplement (PMC3491838; doi:10.1002/emmm.201201250), 2012-08-30

# Supporting Information – Bajrami *et al* Synthetic lethality of PARP and NAMPT inhibition in triple negative breast cancer cells

## Table 1S of Supporting Information – page 2

Composition of siRNA library consisting of 44 PARPs and proteins involved in  $\beta$ -NAD<sup>+</sup> metabolism.

## Table 2S of Supporting Information– page 3

Drug Effect Z scores. Gene symbols for each siGENOME SMARTPool are shown as are DE Z scores.

## Table S3 of Supporting Information– page 4

PARP inhibitor sensitivity in a panel of triple negative cell lines.

Cells were plated in six-well plates and treated for 14 days, after which SFs were estimated.

Fold change survival under different conditions is shown in comparison to controls for each experiment.

*p* values shown were calculated using ANOVA.

## Table S4 of Supporting Information– page 5

Inhibition of NAMPT using an inhibitor, FK866 sensitizes a panel of triple negative cell lines to olaparib.

Fold change has been calculated in comparison to olaparib treatment alone.

*p* values shown were calculated using ANOVA.

## Table S5A of Supporting Information – page 6

*In vivo* efficacy of olaparib in combination with FK866 inhibitor in triple negative breast cancer xenografts. Repeated measures ANOVA *p* values of each comparison made in the *in vivo* study using a Newman-Keuls post test. Here, a repeated measures ANOVA analysis was used to compare tumour volumes in different cohorts across all time points.

## Table S5B of Supporting Information – page 6

Mean tumour volumes and SEMs of tumour volumes for each cohort described in Figure 6.

## Table S6 of Supporting Information – page 7

Student's *t* test analysis of Supporting Figure S2

## Supporting Figure 1. – page 8

HTS analysis. Raw Cell Titre Glo luciferase readings from the HTS were processed as described in (Lord et al, 2008).

In brief, Cell Titre Go readings were first  $\log_2$  transformed and then centered according to the plate  $\log_2$  transformed median.

The effect on PARP inhibitor sensitivity caused by each siRNA was calculated according to the following equation:

Drug Effect (DE) of siRNA for gene X = (median centered data from olaparib-treated wells for gene X) - (median centered data from DMSO-treated wells for gene X). Calculation of the Median Absolute Deviation (MAD) was used to estimate the variance of the DE data. Standardised Z scores for DE were calculated using DE values, the median DE from the entire library and the MAD as variables. A similar analysis was conducted to estimate the effect of each siRNA upon cell viability in the absence of olaparib and siRNAs that caused significant cell inhibition alone ( $Z < -3$ ) were excluded from the final analysis. In total we used data from three biological replicate screens in the final analysis. (A) Dynamic range of the screen/transfection efficiency was assessed by comparing the median viability effects (and variance) of siRNAs targeting essential genes. Z prime (Boutros et al, 2006) plots generated by Cell HTS2 (Boutros et al, 2006) indicate a suitable dynamic range between lethal siRNAs targeting either PLK1 or UBB and control, non-targeting siRNAs and thus a high-efficiency transfection. (B) Schematic of high-throughput siRNA screen targeting 44 PARP and NAD metabolism proteins. The genes targeted in the siRNA library were curated from literature descriptions of proteins having well-established or casual links to NAD metabolism and these are listed in Supporting Table 1. CAL51 cells were reverse transfected in a 96 well-plate format with Dharmacon siGENOME SMARTPools siRNAs. Forty-eight hours after transfection, media either containing the clinical PARP1/2 inhibitor olaparib (1  $\mu$ M final concentration) or the drug vehicle, DMSO, was added to replica plates. After five days continuous culture in the presence of olaparib, cell viability was estimated using Cell-Titre Glo (Promega). Screen data was processed as described in the Materials and Methods. (C) Performance of biological replicas analysed using Spearman's coefficient  $R = 0.45-0.97$ .

## Supporting Figure 2. – page 9

Effect on cell viability of FK866 in (A) CAL51 (B) Hela (C) MDAMB468, (D) SUM149 (E) MDAMB231 (F) HS578T (G) BT20 and (H) DLD1 *BRCA2*<sup>-/-</sup> and *BRCA2*<sup>+/+</sup> cells. See also Supporting Table S6.

## Supporting Figure 3. – page 10

(A) Effect of the FK866/olaparib combination on MCF10A cell viability. (B) Effect of FK866 on MCF10A cell viability. Cells were treated as in Figure 4. (C) Sensitising effect of NAMPT siRNA on olaparib sensitivity in *BRCA2*<sup>-/-</sup> or *BRCA2*<sup>+/+</sup> DLD1 cells. Viability was measured after six days of continuous exposure. Error bars represent the SEM from three independent experiments. \**p* < 0.001 (Student's *t*-test).

## Supporting Figure 4. $\gamma$ H2AX focus formation – pages 11 - 15

(A) Confocal images of  $\gamma$ H2AX foci (red), and nuclei (stained with DAPI – blue) are shown. The scale bar represents 10  $\mu$ m. (B) Effect of FK866 on caspase 3/7 activity as measured by the ApoToxGlo Triplex kit (Promega). CAL51 cells were exposed to FK866 for 48 hours and assessed as in the materials and methods.

Supporting  
Table 1

| <b>Symbol</b>                                      | <b>Gene ID</b> | <b>Accession</b> |
|----------------------------------------------------|----------------|------------------|
| <b>PARPs</b>                                       |                |                  |
| PARP1                                              | 142            | NM_001618        |
| PARP2                                              | 10038          | NM_001042618     |
| PARP3                                              | 10039          | NM_001003931     |
| PARP4                                              | 143            | NM_006437        |
| TNKS                                               | 8658           | NM_003747        |
| TNKS2                                              | 80351          | NM_025235        |
| PARP6                                              | 56965          | NM_020214        |
| TIPARP                                             | 25976          | NM_015508        |
| PARP8                                              | 79668          | NM_024615        |
| PARP9                                              | 83666          | NM_031458        |
| PARP10                                             | 84875          | NM_032789        |
| PARP11                                             | 57097          | NM_020367        |
| PARP12                                             | 64761          | NM_022750        |
| PARP13                                             | 56829          | NM_020119        |
| PARP14                                             | 54625          | NM_017554        |
| PARP15                                             | 165631         | NM_152615        |
| PARP16                                             | 54956          | NM_017851        |
| <b>PARG</b>                                        |                |                  |
| PARG                                               | 8505           | NM_003631        |
| <b>SIRT</b>                                        |                |                  |
| SIRT1                                              | 23411          | NM_012238        |
| SIRT2                                              | 22933          | NM_030593        |
| SIRT3                                              | 23410          | NM_012239        |
| SIRT4                                              | 23409          | NM_012240        |
| SIRT5                                              | 23408          | NM_031244        |
| SIRT6                                              | 51548          | NM_016539        |
| SIRT7                                              | 51547          | NM_016538        |
| <b>ADP-ribose synthases</b>                        |                |                  |
| CD38                                               | 952            | NM_001775        |
| BST1                                               | 683            | NM_004334        |
| <b>ADP-ribose transferases</b>                     |                |                  |
| ART1                                               | 417            | NM_004314        |
| ART3                                               | 419            | NM_001179        |
| ART4                                               | 420            | NM_021071        |
| ART5                                               | 116969         | NM_053017        |
| <b>ADP-Ribosylhydrolases</b>                       |                |                  |
| ADPRHL1                                            | 113662         | NM_138430        |
| ADPRHL2                                            | 54936          | NM_017825        |
| ADPRH                                              | 141            | NM_001125        |
| NUDT5                                              | 11164          | NM_014142        |
| NUDT9                                              | 53343          | NM_024047        |
| NUDT14                                             | 256281         | NM_177533        |
| NUDT12                                             | 83594          | NM_031438        |
| <b>Nicotinamide nucleotide adenyl transferases</b> |                |                  |
| NMNAT1                                             | 64802          | NM_022787        |
| NMNAT2                                             | 23057          | NM_015039        |
| NMNAT3                                             | 349565         | NM_178177        |
| <b>Nicotinamide phosphoribosyltransferase</b>      |                |                  |
| NAMPT                                              | 10135          | NM_005746        |
| <b>NAD synthetase</b>                              |                |                  |
| NADSYN1                                            | 55191          | NM_018161        |
| <b>Nicotinic acid phosphoribosyltransferase</b>    |                |                  |
| NAPRT                                              | 93100          | NM_145201        |

Supporting  
Table 2

| <b>siRNA<br/>SMARTpool</b> | <b>Median PARPi<br/>Z-score<br/>Sensitivity</b> | <b>Median<br/>Growth %<br/>siCONTROL</b> |
|----------------------------|-------------------------------------------------|------------------------------------------|
| NAMPT                      | -9.87                                           | 98                                       |
| PARP10                     | -1.55                                           | 105                                      |
| BST1                       | -1.09                                           | 102                                      |
| NMNAT3                     | -0.88                                           | 101                                      |
| PARP3                      | -0.79                                           | 100                                      |
| PARP11                     | -0.72                                           | 100                                      |
| PARP4                      | -0.66                                           | 99                                       |
| PARP6                      | -0.65                                           | 101                                      |
| NUDT9                      | -0.59                                           | 105                                      |
| TNKS2                      | -0.51                                           | 100                                      |
| PARP15                     | -0.46                                           | 103                                      |
| NAPRT                      | -0.44                                           | 98                                       |
| PARP2                      | -0.41                                           | 99                                       |
| ART5                       | -0.40                                           | 103                                      |
| ADPRH                      | -0.40                                           | 105                                      |
| PARP12                     | -0.36                                           | 103                                      |
| TIPARP                     | -0.29                                           | 100                                      |
| SIRT1                      | -0.26                                           | 102                                      |
| NADSYN1                    | -0.23                                           | 101                                      |
| ART3                       | -0.22                                           | 102                                      |
| ART1                       | -0.22                                           | 99                                       |
| TNKS                       | -0.19                                           | 100                                      |
| PARP14                     | -0.15                                           | 104                                      |
| CD38                       | -0.15                                           | 101                                      |
| NUDT14                     | -0.13                                           | 103                                      |
| SIRT7                      | -0.02                                           | 100                                      |
| PARP13                     | -0.01                                           | 100                                      |
| SIRT5                      | 0.02                                            | 99                                       |
| PARP9                      | 0.11                                            | 96                                       |
| NUDT5                      | 0.16                                            | 102                                      |
| ADPRHL1                    | 0.20                                            | 103                                      |
| PARP16                     | 0.21                                            | 103                                      |
| ADPRHL2                    | 0.22                                            | 104                                      |
| NMNAT1                     | 0.26                                            | 104                                      |
| NUDT12                     | 0.29                                            | 103                                      |
| PARP1                      | 0.31                                            | 98                                       |
| PARP8                      | 0.32                                            | 98                                       |
| SIRT6                      | 0.33                                            | 100                                      |
| ART4                       | 0.34                                            | 102                                      |
| SIRT3                      | 0.34                                            | 97                                       |
| SIRT4                      | 0.35                                            | 99                                       |
| SIRT2                      | 0.42                                            | 98                                       |
| PARG                       | 0.51                                            | 99                                       |
| NMNAT2                     | 0.72                                            | 101                                      |

Supporting  
Table 3

A

| Cell line  | SF <sub>50</sub> [Olaparib] $\mu$ M |
|------------|-------------------------------------|
| HS578T     | 6.3418                              |
| MDA-MB-231 | 26.7178                             |
| SUM149     | 0.0133                              |
| MDA-MB-468 | 1.2515                              |
| MDA-MB-436 | 0.0002                              |
| CAL51      | 1.0140                              |
| BT20       | >100                                |

B

| CAL51                 |                     |                                            |                          |
|-----------------------|---------------------|--------------------------------------------|--------------------------|
| siRNA                 | SF <sub>50</sub> nM | Fold increase vs. siCON1 transfected cells | ANOVA p value vs. siCON1 |
| NAMPT siRNA 1         | 96                  | 8                                          | < 0.0001                 |
| NAMPT siRNA 2         | 26                  | 29                                         | < 0.0001                 |
| NAMPT siRNA 3         | 84                  | 9                                          | < 0.0001                 |
| NAMPT siRNA SmartPool | 75                  | 10                                         | < 0.0001                 |
| siCON 1               | 758                 | 1                                          | ns                       |
| BRCA2 siRNA           | 1                   | 661                                        | < 0.0001                 |

C

| HeLa                  |                     |                                            |                           |
|-----------------------|---------------------|--------------------------------------------|---------------------------|
| siRNA                 | SF <sub>50</sub> nM | Fold increase vs. siCON1 transfected cells | ANOVA p value vs. siCON 1 |
| NAMPT siRNA 1         | 468                 | 8                                          | < 0.0001                  |
| NAMPT siRNA 2         | 1041                | 3                                          | 0.0001                    |
| NAMPT siRNA 3         | 256                 | 14                                         | < 0.0001                  |
| NAMPT siRNA SmartPool | 128                 | 28                                         | < 0.0001                  |
| siCON 1               | 3631                | 1                                          | ns                        |
| BRCA2 siRNA           | 6                   | 634                                        | < 0.0001                  |

D

| CAL51                               |                     |                                  |                                  |
|-------------------------------------|---------------------|----------------------------------|----------------------------------|
| Treatment                           | SF <sub>50</sub> nM | Fold increase vs. olaparib alone | ANOVA p value vs. olaparib alone |
| Olaparib alone                      | 2377                | 1                                | ns                               |
| FK866i 10 <sup>-13</sup> + Olaparib | 2047                | 1                                | ns                               |
| FK866i 10 <sup>-12</sup> + Olaparib | 1667                | 1                                | ns                               |
| FK866i 10 <sup>-11</sup> +Olaparib  | 1895                | 1                                | ns                               |
| FK866i 10 <sup>-10</sup> +Olaparib  | 860                 | 3                                | 0.0006                           |
| FK866i 10 <sup>-9</sup> + Olaparib  | 713                 | 3                                | < 0.0001                         |
| FK866i 10 <sup>-8</sup> + Olaparib  | 442                 | 5                                | < 0.0001                         |
| FK866i 10 <sup>-7</sup> + Olaparib  | 67                  | 36                               | < 0.0001                         |

E

| HeLa                                |                     |                                  |                                  |
|-------------------------------------|---------------------|----------------------------------|----------------------------------|
| Treatment                           | SF <sub>50</sub> nM | Fold increase vs. olaparib alone | ANOVA p value vs. olaparib alone |
| Olaparib alone                      | 7792                | 1                                | ns                               |
| FK866i 10 <sup>-13</sup> + Olaparib | 2156                | 4                                | < 0.0001                         |
| FK866i 10 <sup>-12</sup> + Olaparib | 4241                | 2                                | < 0.0001                         |
| FK866i 10 <sup>-11</sup> +Olaparib  | 3774                | 2                                | < 0.0001                         |
| FK866i 10 <sup>-10</sup> +Olaparib  | 4100                | 2                                | 0.0001                           |
| FK866i 10 <sup>-9</sup> + Olaparib  | 4916                | 2                                | 0.0051                           |
| FK866i 10 <sup>-8</sup> + Olaparib  | 2913                | 3                                | < 0.0001                         |
| FK866i 10 <sup>-7</sup> + Olaparib  | 675                 | 12                               | < 0.0001                         |

# Supporting Table 4

A

| MDAMB468                           |                     |                                  |                                  |
|------------------------------------|---------------------|----------------------------------|----------------------------------|
| Treatment                          | SF <sub>50</sub> nM | Fold increase vs. olaparib alone | ANOVA p value vs. olaparib alone |
| Olaparib alone                     | 982                 | 1                                | ns                               |
| FK866i 10 <sup>-11</sup> +Olaparib | 269                 | 4                                | < 0.0001                         |
| FK866i 10 <sup>-10</sup> +Olaparib | 164                 | 6                                | 0.0001                           |
| FK866i 10 <sup>-9</sup> + Olaparib | 10                  | 95                               | 0.0051                           |

B

| SUM149                             |                     |                                  |                                  |
|------------------------------------|---------------------|----------------------------------|----------------------------------|
| Treatment                          | SF <sub>50</sub> nM | Fold increase vs. olaparib alone | ANOVA p value vs. olaparib alone |
| Olaparib alone                     | 141                 | 1                                | ns                               |
| FK866i 10 <sup>-11</sup> +Olaparib | 16                  | 9                                | ns                               |
| FK866i 10 <sup>-10</sup> +Olaparib | 4                   | 39                               | 0.0127                           |
| FK866i 10 <sup>-9</sup> + Olaparib | 1                   | 97                               | 0.0012                           |

C

| MDAMB231                           |                     |                                  |                                  |
|------------------------------------|---------------------|----------------------------------|----------------------------------|
| Treatment                          | SF <sub>50</sub> nM | Fold increase vs. olaparib alone | ANOVA p value vs. olaparib alone |
| Olaparib alone                     | 11385               | 1                                | ns                               |
| FK866i 10 <sup>-11</sup> +Olaparib | 6228                | 2                                | 0.053                            |
| FK866i 10 <sup>-10</sup> +Olaparib | 4901                | 2                                | 0.0002                           |
| FK866i 10 <sup>-9</sup> + Olaparib | 5281                | 2                                | 0.0001                           |

D

| HS578T                             |                     |                                  |                                  |
|------------------------------------|---------------------|----------------------------------|----------------------------------|
| Treatment                          | SF <sub>50</sub> nM | Fold increase vs. olaparib alone | ANOVA p value vs. olaparib alone |
| Olaparib alone                     | 5525                | 1                                | ns                               |
| FK866i 10 <sup>-11</sup> +Olaparib | 1055                | 5                                | 0.012                            |
| FK866i 10 <sup>-10</sup> +Olaparib | 956                 | 6                                | 0.0002                           |
| FK866i 10 <sup>-9</sup> + Olaparib | 1343                | 4                                | 0.0077                           |

E

| BT20                               |                     |                                  |                                  |
|------------------------------------|---------------------|----------------------------------|----------------------------------|
| Treatment                          | SF <sub>50</sub> nM | Fold increase vs. olaparib alone | ANOVA p value vs. olaparib alone |
| Olaparib alone                     | 11371               | 1                                | ns                               |
| FK866i 10 <sup>-11</sup> +Olaparib | 2773                | 4                                | ns                               |
| FK866i 10 <sup>-10</sup> +Olaparib | 1571                | 7                                | 0.0068                           |
| FK866i 10 <sup>-9</sup> + Olaparib | 720                 | 16                               | 0.0002                           |

F

| Cell Line                 | Treatment                          | SF <sub>50</sub> nM | Fold increase vs. olaparib alone | DLD1 BRCA2 <sup>+/+</sup>        |                                                      | DLD1 BRCA2 <sup>-/-</sup>        |                                                      |
|---------------------------|------------------------------------|---------------------|----------------------------------|----------------------------------|------------------------------------------------------|----------------------------------|------------------------------------------------------|
|                           |                                    |                     |                                  | ANOVA p value vs. olaparib alone | ANOVA p value vs. FK866i 10 <sup>-7</sup> + Olaparib | ANOVA p value vs. olaparib alone | ANOVA p value vs. FK866i 10 <sup>-7</sup> + Olaparib |
| DLD1 BRCA2 <sup>+/+</sup> | Olaparib alone                     | 1192.4              | 1                                | ns                               | ns                                                   | 0.0003                           | < 0.0001                                             |
|                           | FK866i 10 <sup>-7</sup> + Olaparib | 869.4               | 1                                | ns                               | ns                                                   | < 0.0001                         | < 0.0001                                             |
| DLD1 BRCA2 <sup>-/-</sup> | Olaparib alone                     | 1.7                 | 1                                | 0.0003                           | < 0.0001                                             | ns                               | 0.0007                                               |
|                           | FK866i 10 <sup>-7</sup> + Olaparib | 0.4                 | 4                                | < 0.0001                         | < 0.0001                                             | 0.0007                           | ns                                                   |

## Supporting Table 5

A

|                                        | Significant? | Summary |
|----------------------------------------|--------------|---------|
| Olaparib/FK866 combination vs Vehicle  | p<0.001      | ***     |
| Olaparib/FK866 combination vs FK866    | p<0.05       | *       |
| Olaparib/FK866 combination vs Olaparib | p<0.05       | *       |
| Olaparib vs Vehicle                    | p>0.05       | ns      |
| Olaparib vs FK866                      | p>0.05       | ns      |
| FK866 vs Vehicle                       | p>0.05       | ns      |

B

| Days | Vehicle |      | 15 mg/kg Olaparib |      | 6 mg/kg FK866 |      | Olaparib/FK866 combination |      |
|------|---------|------|-------------------|------|---------------|------|----------------------------|------|
|      | Mean    | SEM  | Mean              | SEM  | Mean          | SEM  | Mean                       | SEM  |
| 0    | 1.00    | 0.00 | 1.00              | 0.00 | 1.00          | 0.00 | 1.00                       | 0.00 |
| 3    | 1.33    | 0.14 | 1.67              | 0.19 | 1.72          | 0.30 | 1.42                       | 0.23 |
| 6    | 1.73    | 0.16 | 2.02              | 0.21 | 2.56          | 0.47 | 2.68                       | 0.39 |
| 9    | 2.37    | 0.35 | 2.50              | 0.36 | 2.64          | 0.38 | 2.15                       | 0.32 |
| 12   | 2.97    | 0.33 | 4.07              | 0.68 | 3.50          | 0.54 | 3.00                       | 0.39 |
| 15   | 3.22    | 0.41 | 3.11              | 0.47 | 3.43          | 0.70 | 3.88                       | 0.65 |
| 18   | 5.13    | 0.67 | 5.95              | 1.19 | 6.02          | 0.91 | 4.85                       | 0.76 |
| 21   | 6.86    | 0.69 | 6.84              | 1.58 | 6.55          | 1.06 | 5.50                       | 1.14 |
| 24   | 9.14    | 1.46 | 9.45              | 2.16 | 8.25          | 1.71 | 6.92                       | 1.71 |
| 27   | 12.83   | 2.53 | 11.49             | 2.25 | 11.55         | 2.29 | 7.75                       | 2.22 |
| 30   | 13.48   | 3.73 | 8.57              | 1.55 | 10.03         | 2.03 | 7.92                       | 2.54 |
| 33   | 14.32   | 3.05 | 9.99              | 1.57 | 12.92         | 3.35 | 7.64                       | 2.70 |
| 36   | 21.05   | 6.01 | 11.71             | 2.01 | 13.26         | 3.24 | 9.13                       | 3.41 |
| 39   | 22.73   | 6.68 | 19.05             | 3.08 | 17.93         | 5.43 | 10.94                      | 4.11 |

Supporting  
Table 6

| Cell line     | FK866 concentration (M) | Student's t test p value vs. vehicle |
|---------------|-------------------------|--------------------------------------|
| CAL51         | 1 x 10E-13              | >0.05                                |
| CAL51         | 1 x 10E-12              | >0.05                                |
| CAL51         | 1 x 10E-11              | >0.05                                |
| CAL51         | 1 x 10E-10              | >0.05                                |
| CAL51         | 1 x 10E-9               | >0.05                                |
| CAL51         | 1 x 10E-8               | >0.05                                |
| CAL51         | 1 x 10E-7               | <0.05                                |
| HeLa          | 1 x 10E-13              | >0.05                                |
| HeLa          | 1 x 10E-12              | >0.05                                |
| HeLa          | 1 x 10E-11              | >0.05                                |
| HeLa          | 1 x 10E-10              | >0.05                                |
| HeLa          | 1 x 10E-9               | >0.05                                |
| HeLa          | 1 x 10E-8               | >0.05                                |
| HeLa          | 1 x 10E-7               | >0.05                                |
| MDAMB468      | 1 x 10E-11              | >0.05                                |
| MDAMB468      | 1 x 10E-10              | <0.05                                |
| MDAMB468      | 1 x 10E-9               | <0.05                                |
| SUM149        | 1 x 10E-11              | >0.05                                |
| SUM149        | 1 x 10E-10              | >0.05                                |
| SUM149        | 1 x 10E-9               | >0.05                                |
| MDAMB231      | 1 x 10E-11              | >0.05                                |
| MDAMB231      | 1 x 10E-10              | >0.05                                |
| MDAMB231      | 1 x 10E-9               | <0.05                                |
| HS578T        | 1 x 10E-11              | >0.05                                |
| HS578T        | 1 x 10E-10              | >0.05                                |
| HS578T        | 1 x 10E-9               | >0.05                                |
| BT20          | 1 x 10E-11              | >0.05                                |
| BT20          | 1 x 10E-10              | >0.05                                |
| BT20          | 1 x 10E-9               | <0.05                                |
| DLD1 BRCA2+/+ | 1 x 10E-7               | >0.05                                |
| DLD1 BRCA2-/- | 1 x 10E-7               | >0.05                                |

# Supporting Figure 1

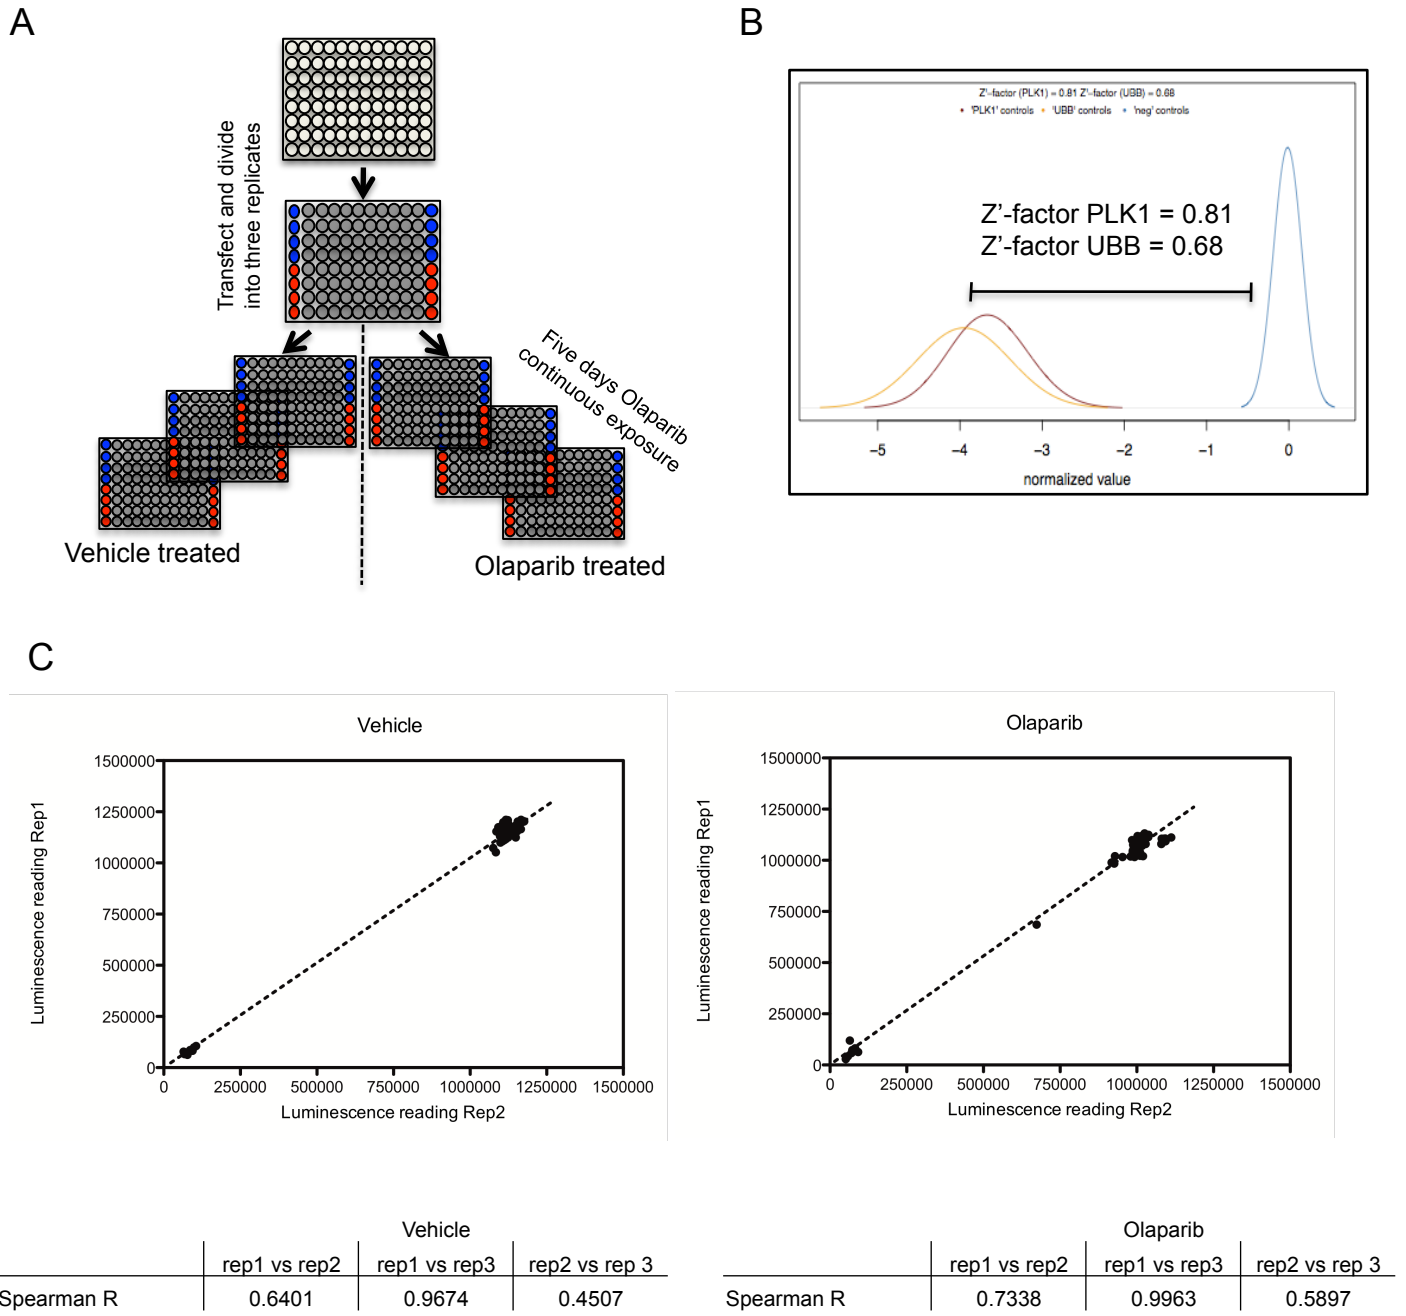



# Supporting Figure 2

A

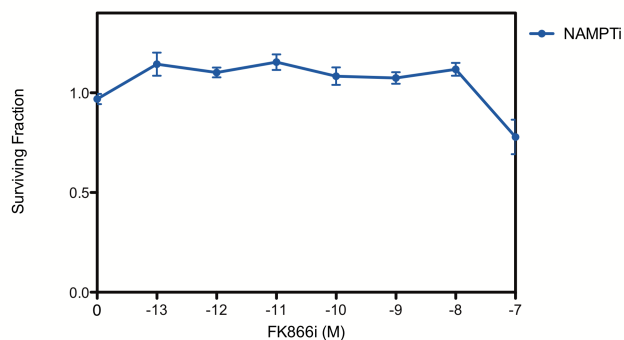

B

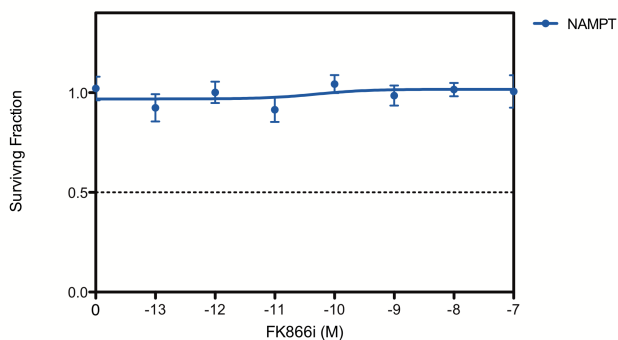

C

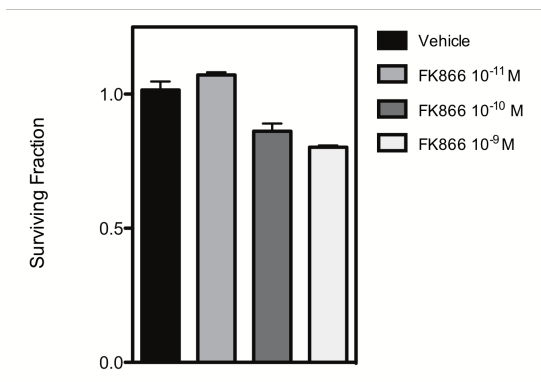

D

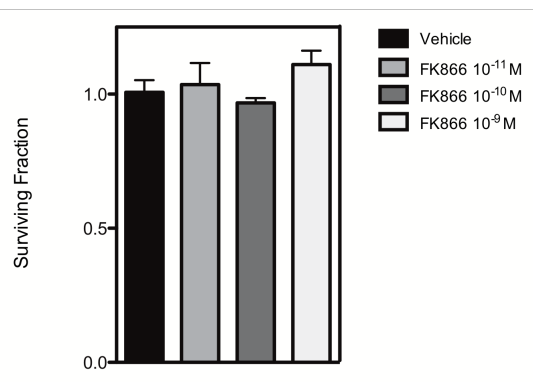

E

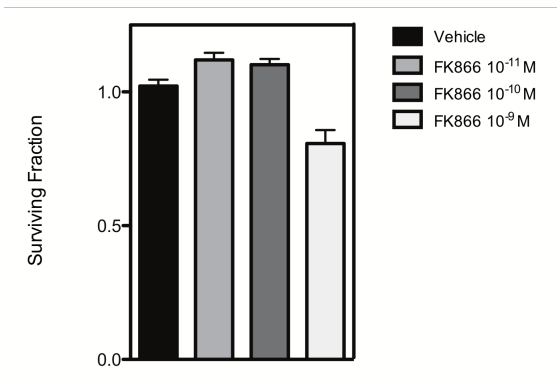

F

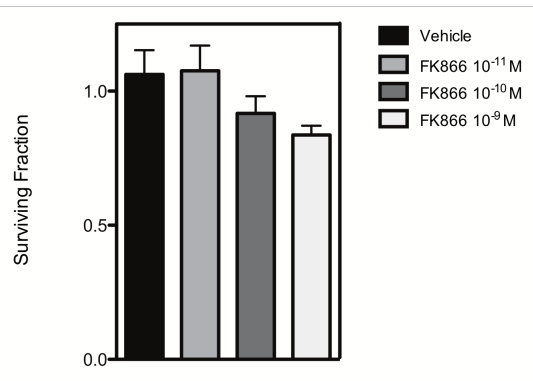

G

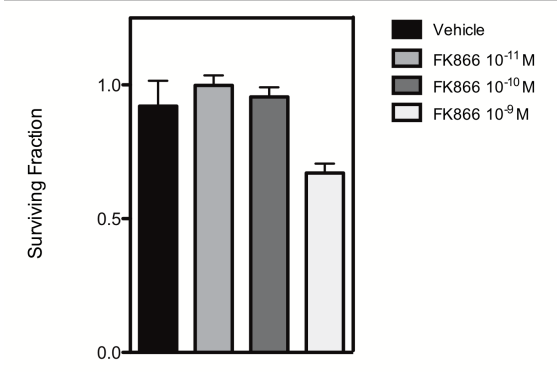

H

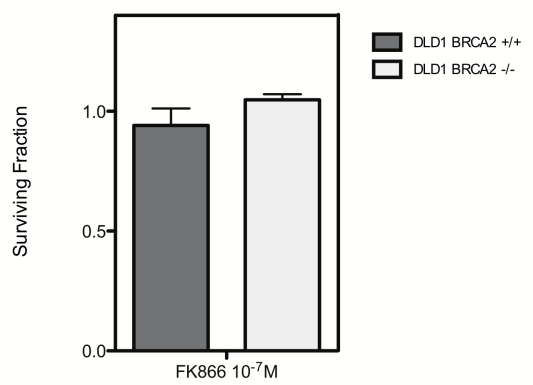

# Supporting Figure 3

A

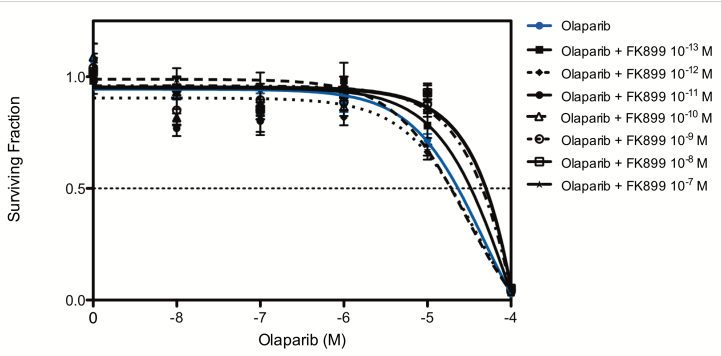

B

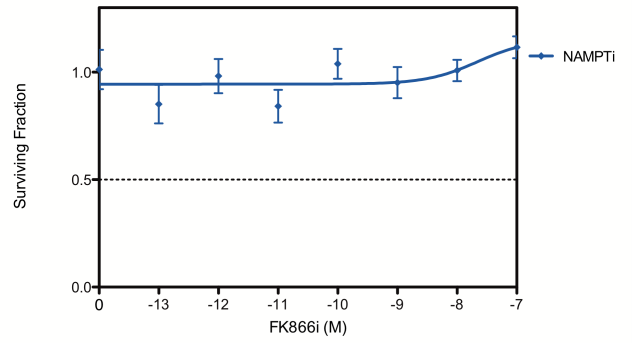

C

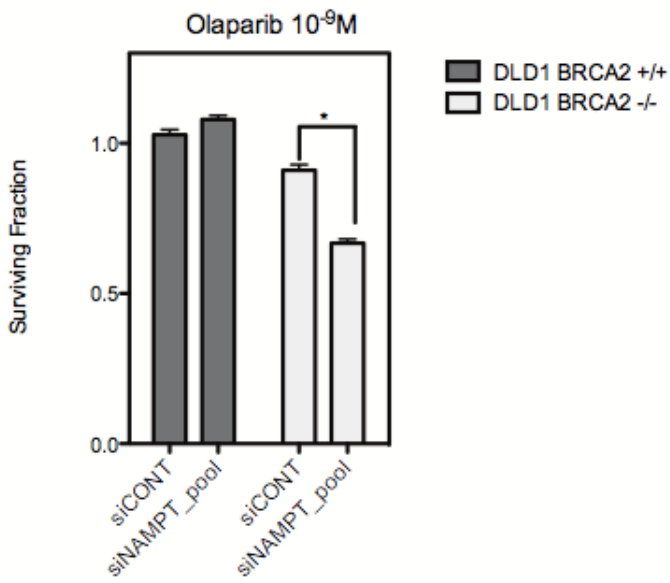

Supporting  
Figure 4

A

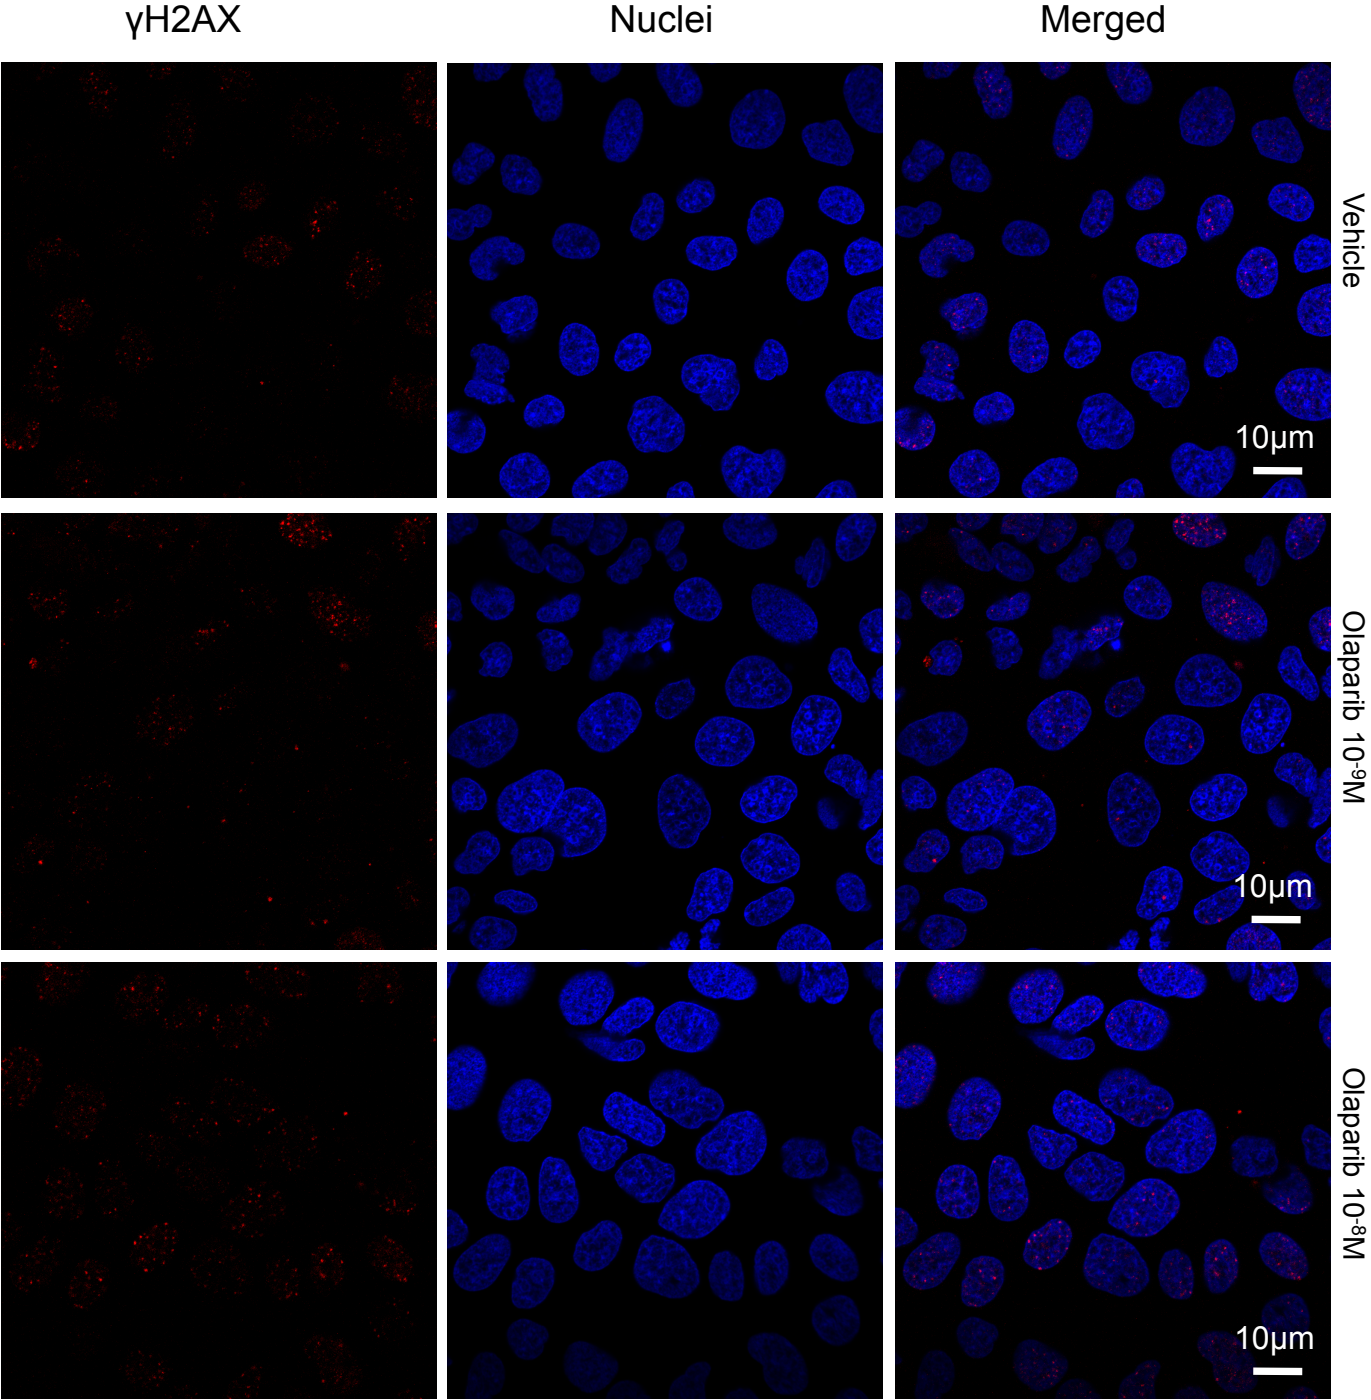

Supporting  
Figure 4

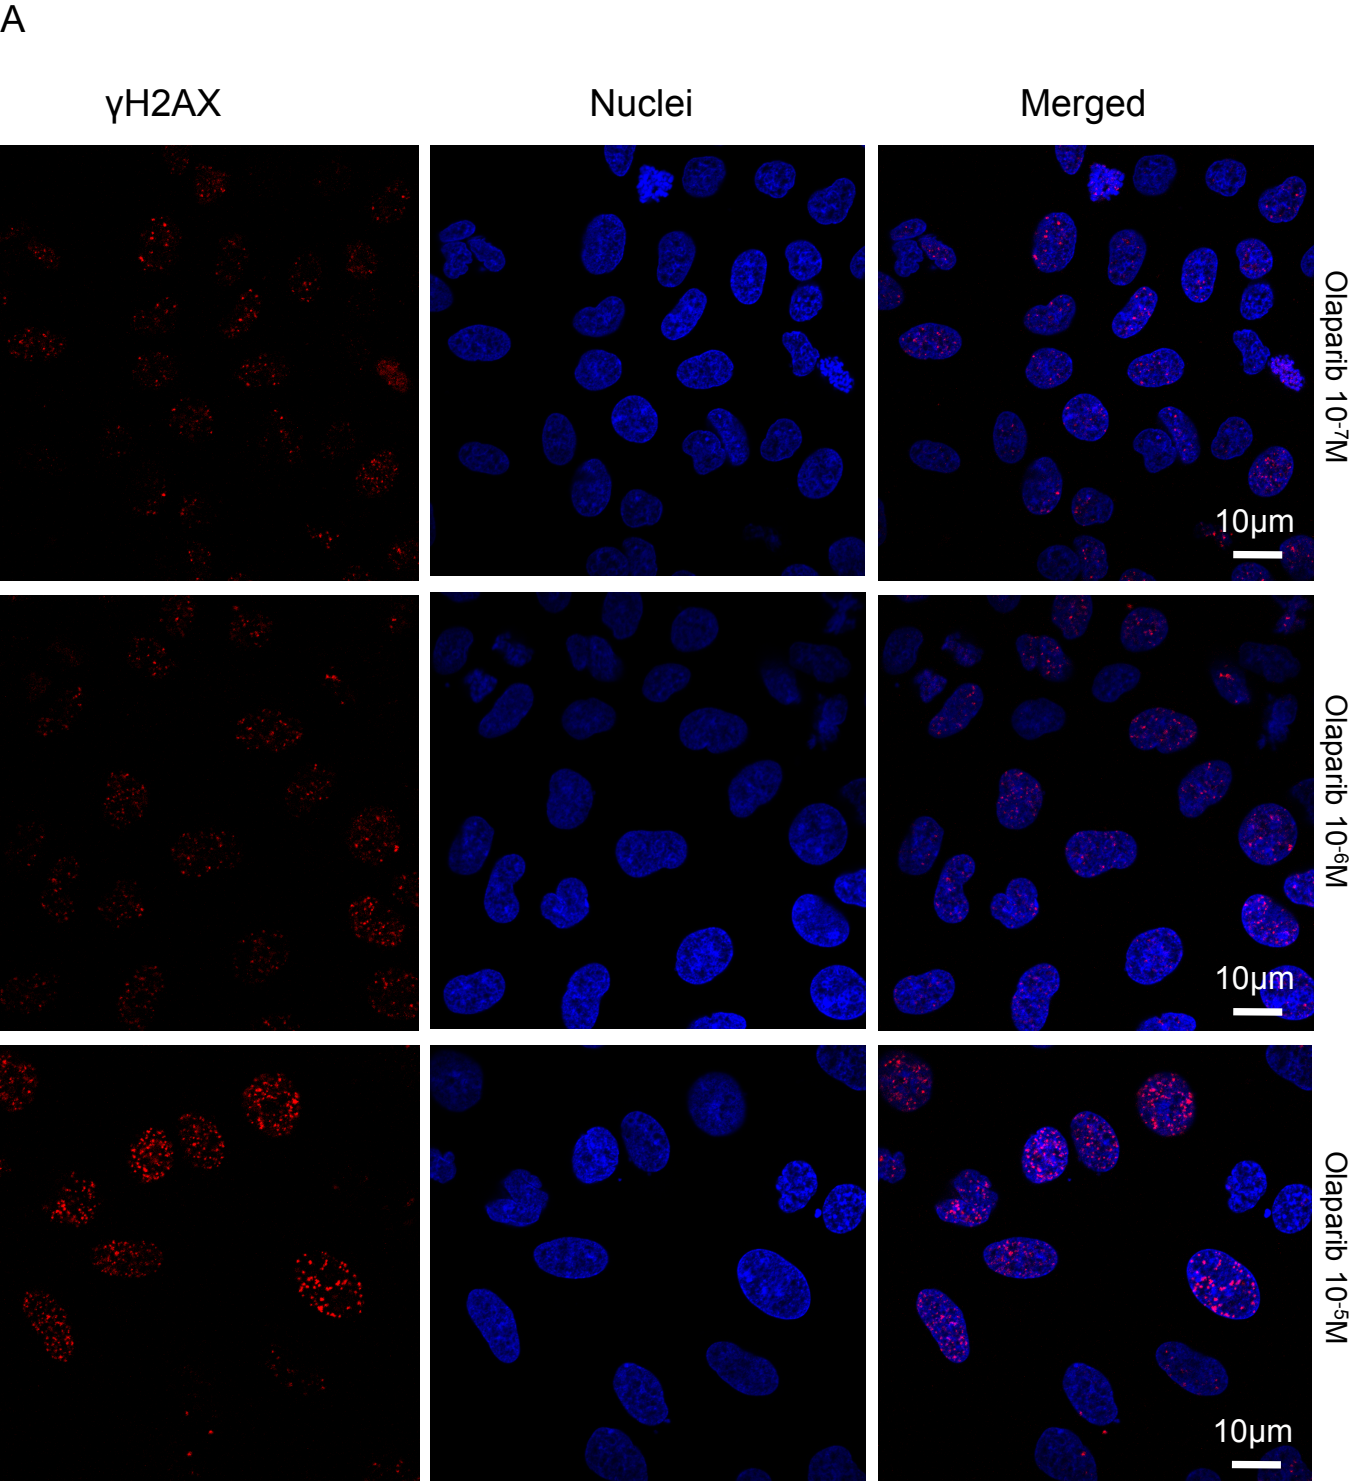

Supporting  
Figure 4

A

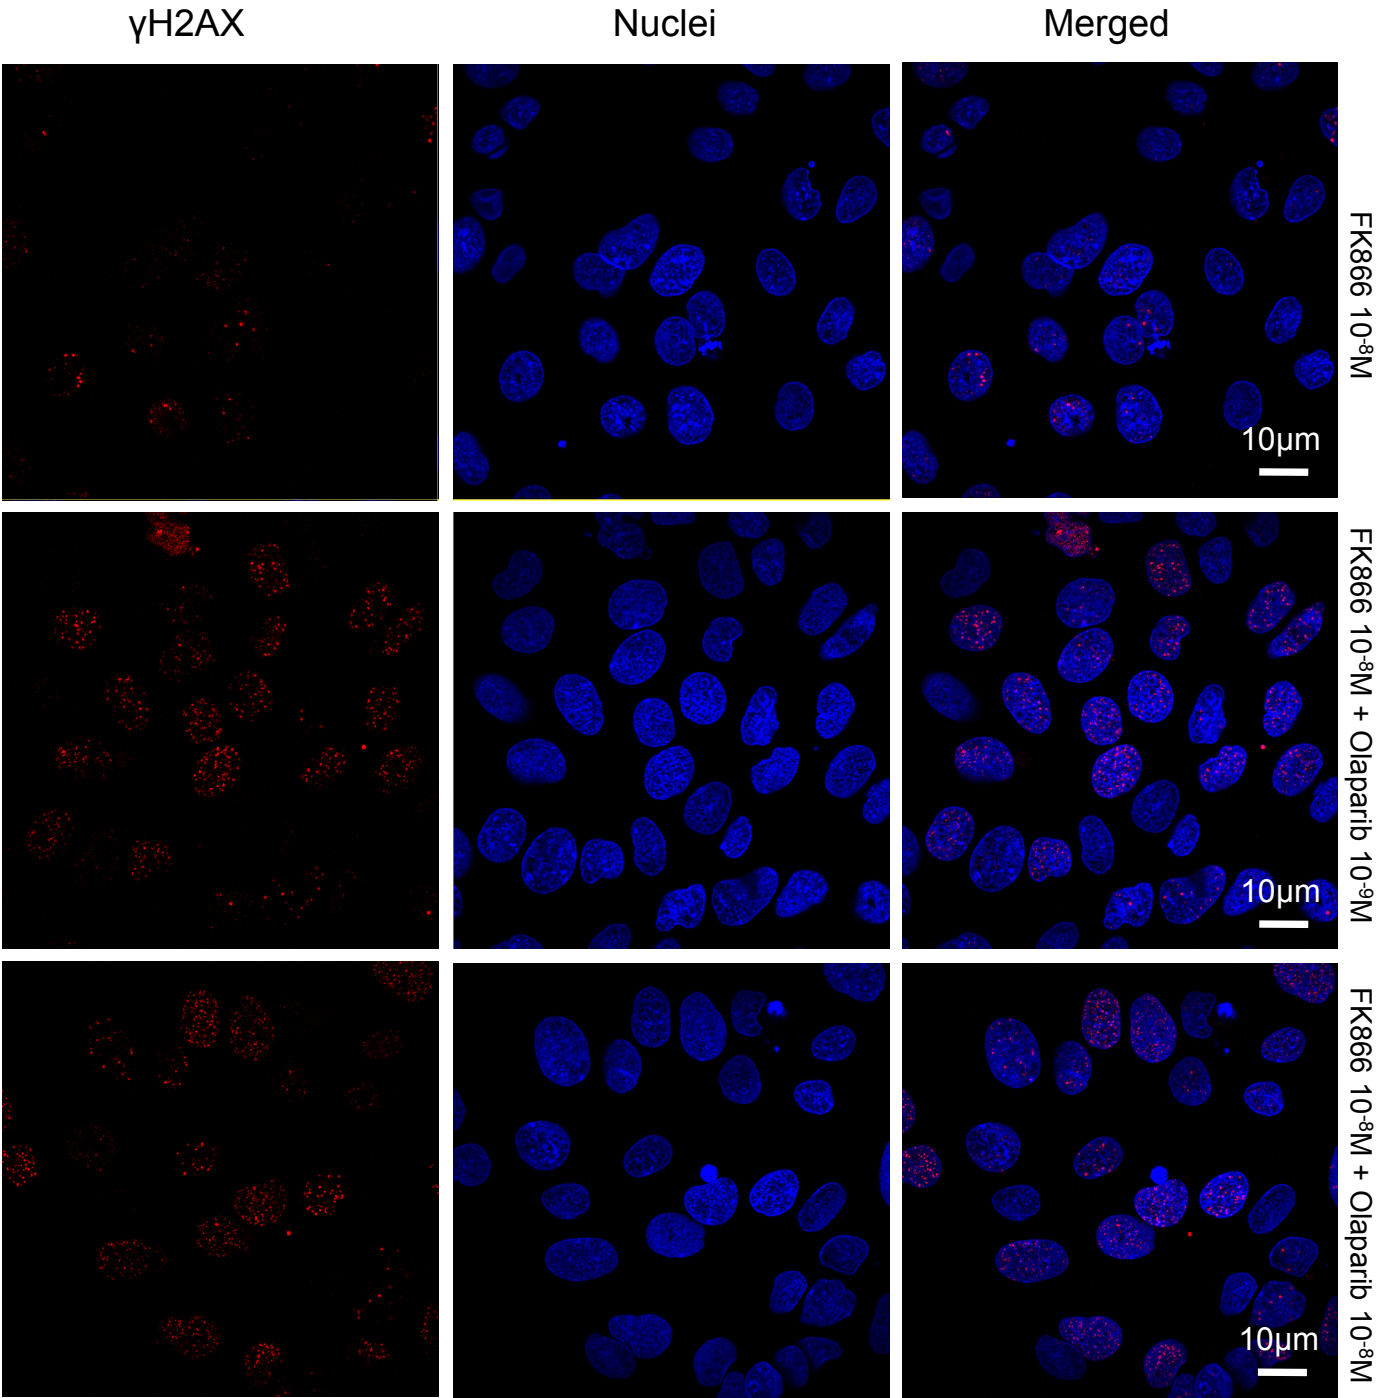

Supporting  
Figure 4  
A

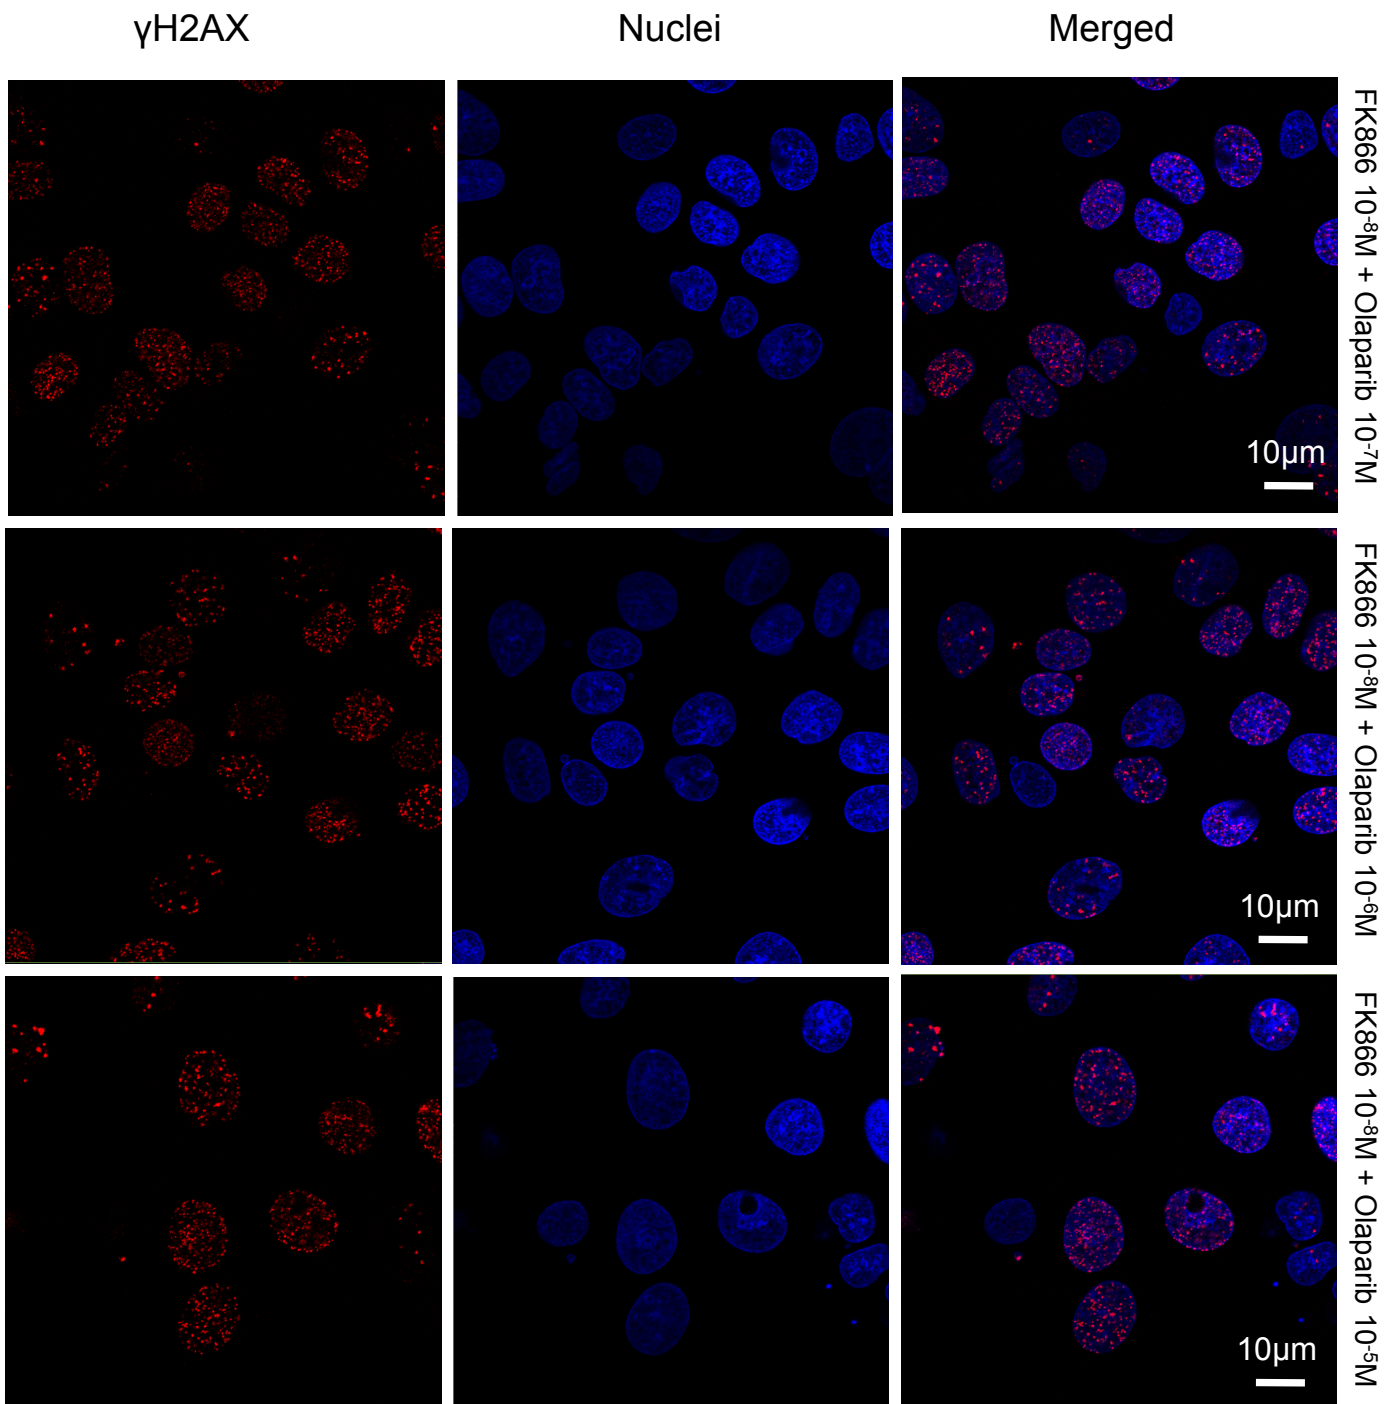

Supporting  
Figure 4  
B

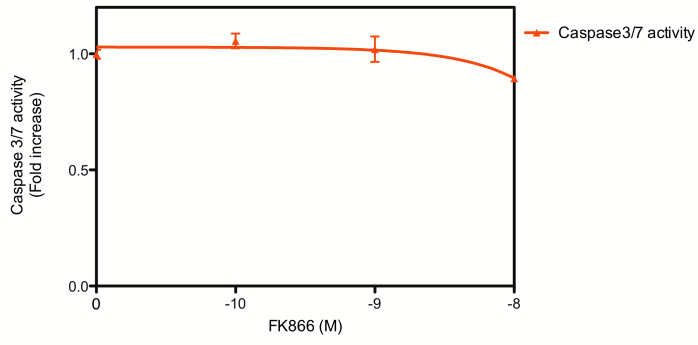

Supplement: emmm0004-1087-SD2.pdf [file emmm0004-1087-SD2.pdf]
